# Supplementary material
Source: bioRxiv or medRxiv preprint supplement (http://medrxiv.org/highwire/filestream/87744/field_highwire_adjunct_files/0/2020.06.27.20141713-1.pdf)
Supplement: Supplementary file [file 2020.06.27.20141713-1.pdf]

**Supplementary material: Diffuse white matter abnormality in very preterm infants reflects reduced brain network efficiency**

Julia E. Kline, PhD<sup>1</sup>, Venkata Sita Priyanka Illapani, MS<sup>1</sup>, Hailong Li, PHD<sup>1</sup>, Lili He, PhD<sup>1,2</sup>,  
Nehal A. Parikh, DO, MS\*<sup>1,2,3</sup>

<sup>1</sup>Perinatal Institute, Cincinnati Children's Hospital Medical Center, Cincinnati, OH

<sup>2</sup>Department of Pediatrics, University of Cincinnati College of Medicine, Cincinnati, OH

<sup>3</sup>Center for Perinatal Research, The Research Institute at Nationwide Children's Hospital, Columbus, OH

\*Corresponding author's contact information:

Nehal A. Parikh, DO, MS

Professor of Pediatrics

Cincinnati Children's Hospital

3333 Burnet Ave, MLC 7009

Cincinnati, OH 45229

(513) 636-7584 (Business)

(513) 803-0969 (Fax)

[Nehal.Parikh@cchmc.org](mailto:Nehal.Parikh@cchmc.org)
